# Supplementary material for: Collagen-disruptive cell therapy: adoptive transfer of membrane-anchored, tumor cell surface vimentin-targeted interleukin 12–armed TILs suppress collagen expression to boost deep T-cell infiltration via dual signaling activation and significant CCKAR reduction.
Source: Research Square preprint supplement (doi:10.21203/rs.3.rs-5104493/v1), 2024-10-29
Supplement: Supplementary file 1 [file 1280e92b12746f436e3654e9.docx]

Fig. S1


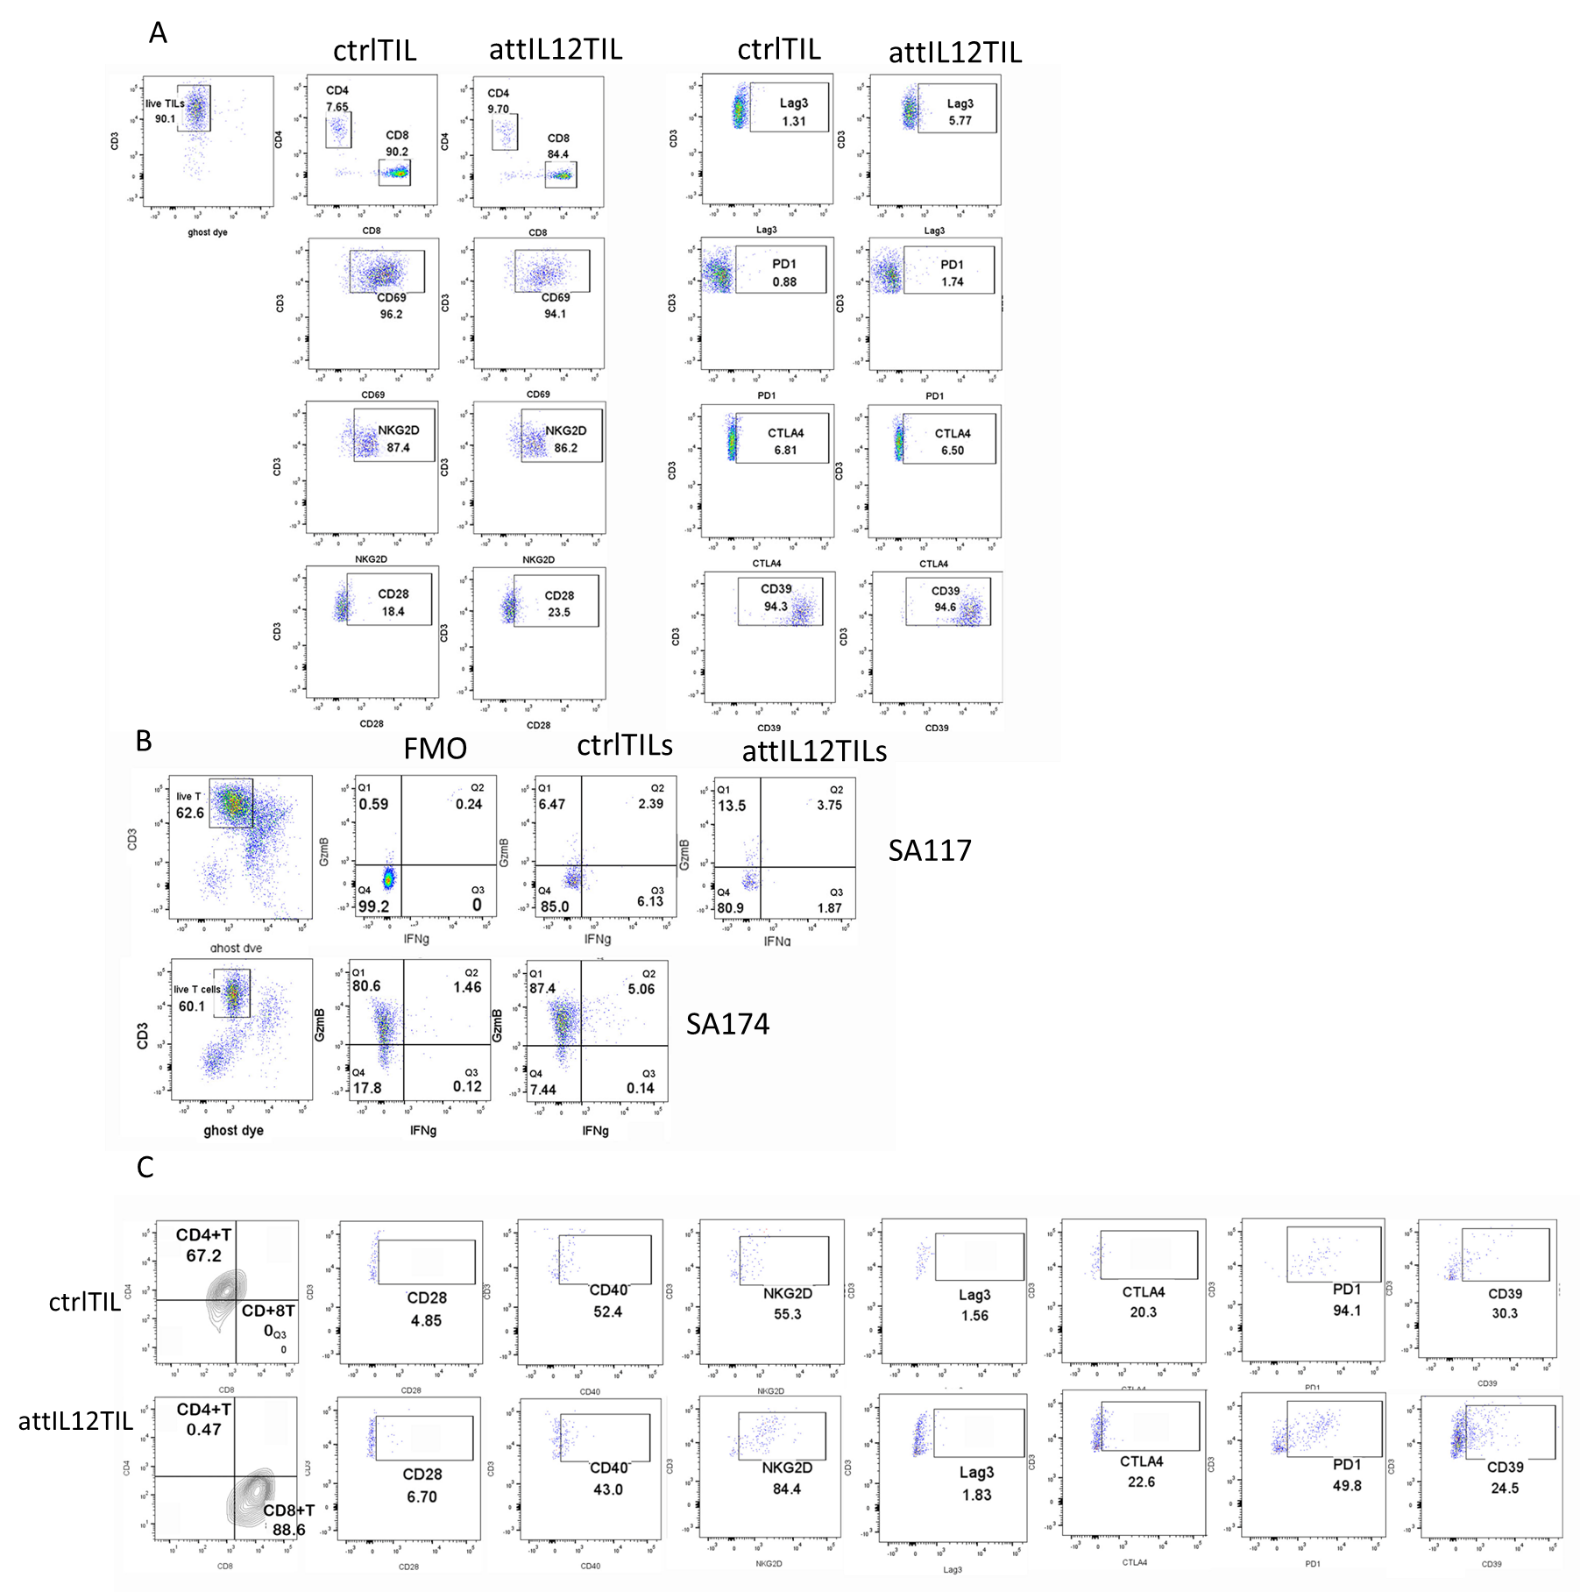


Fig. S2


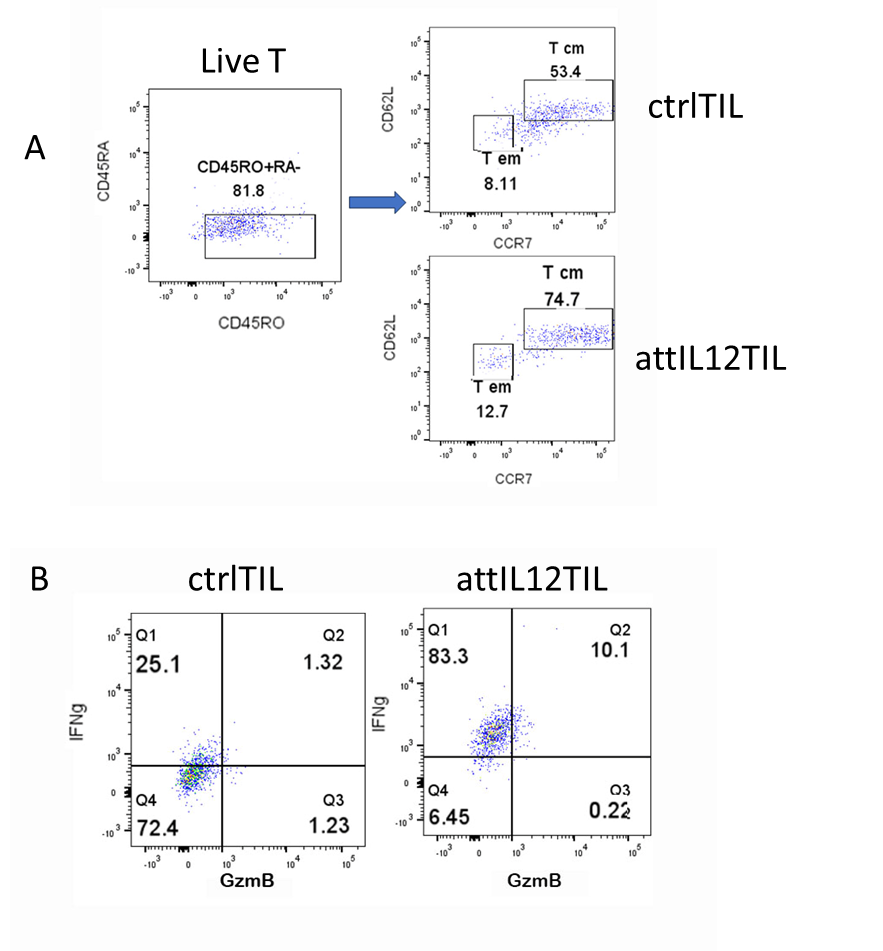


Fig. S3


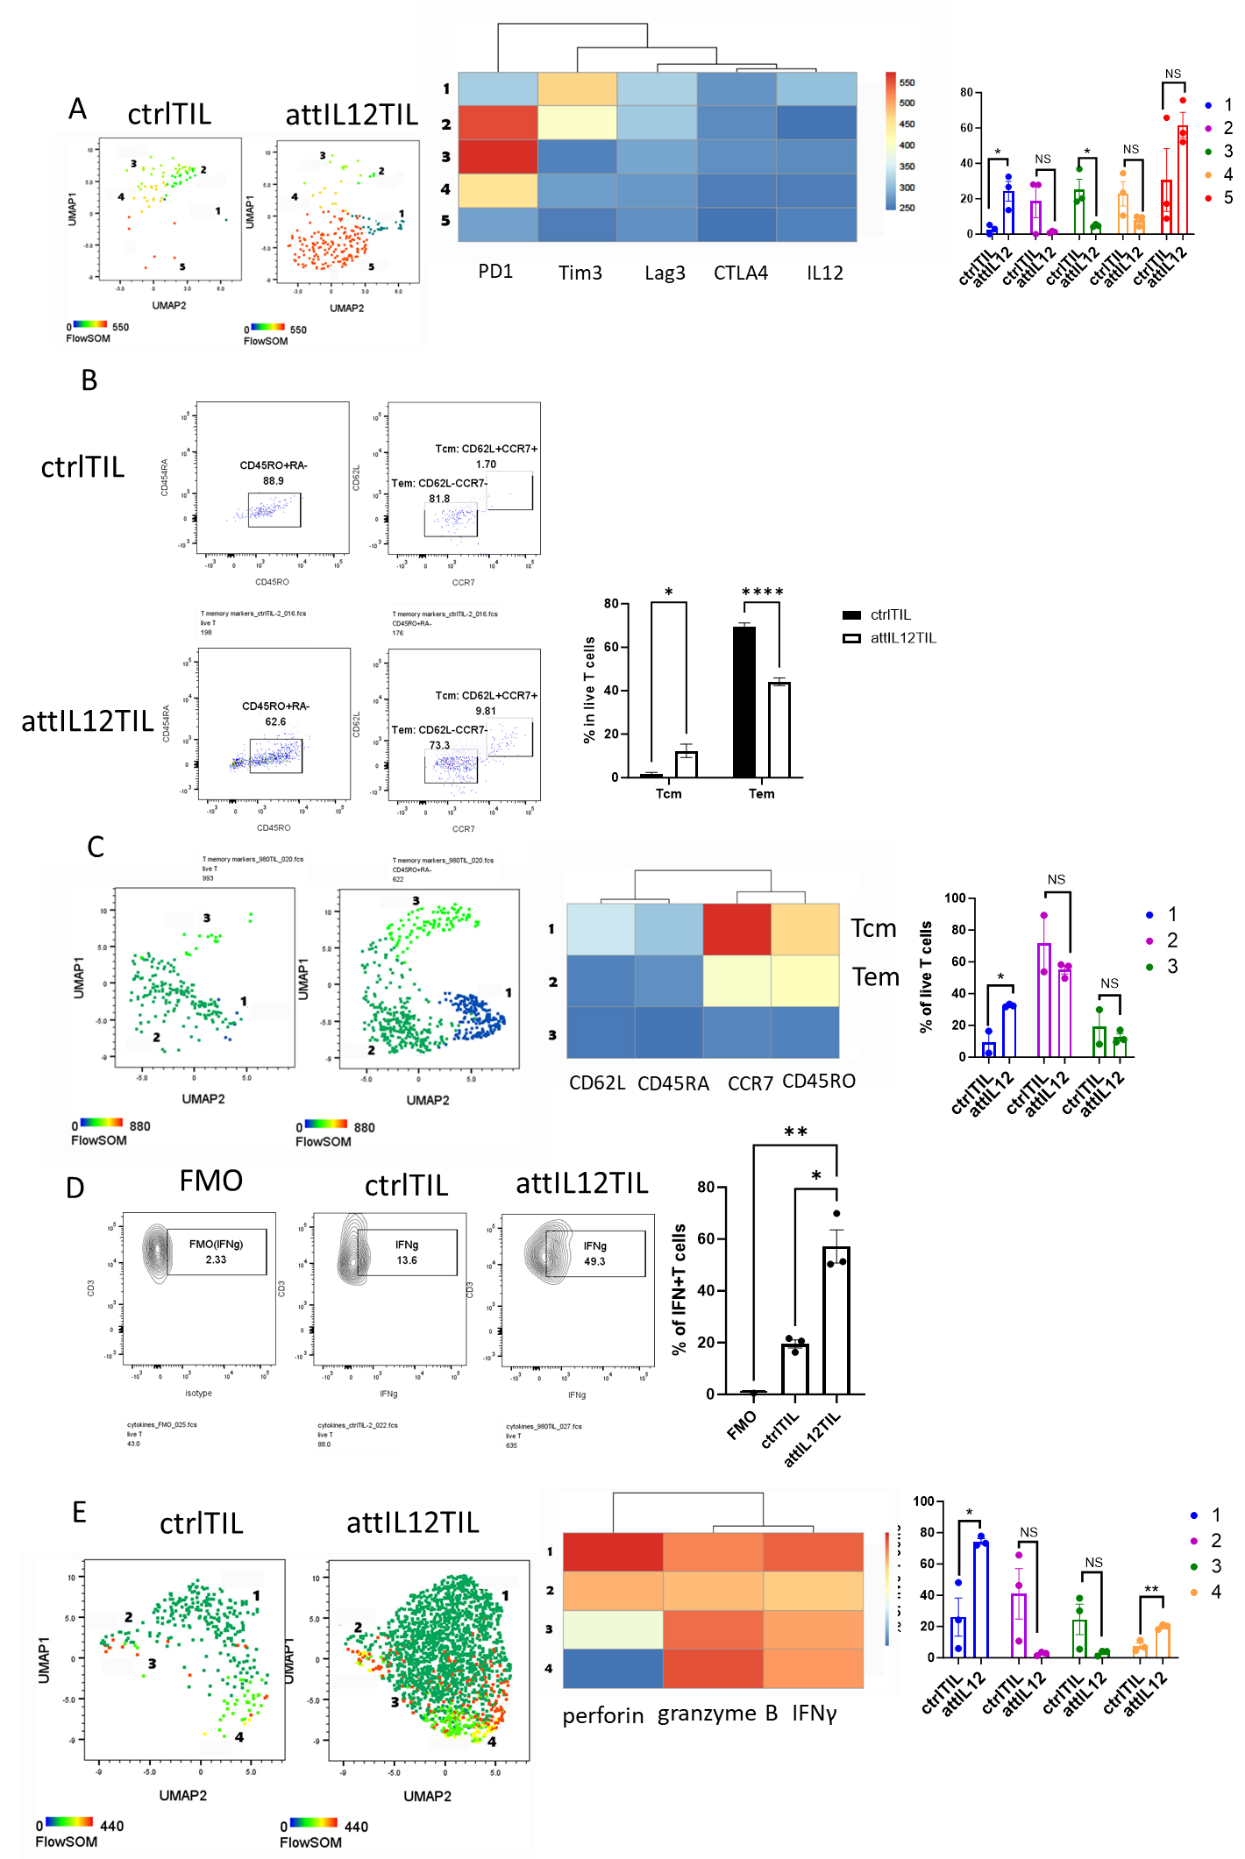


Fig. S4


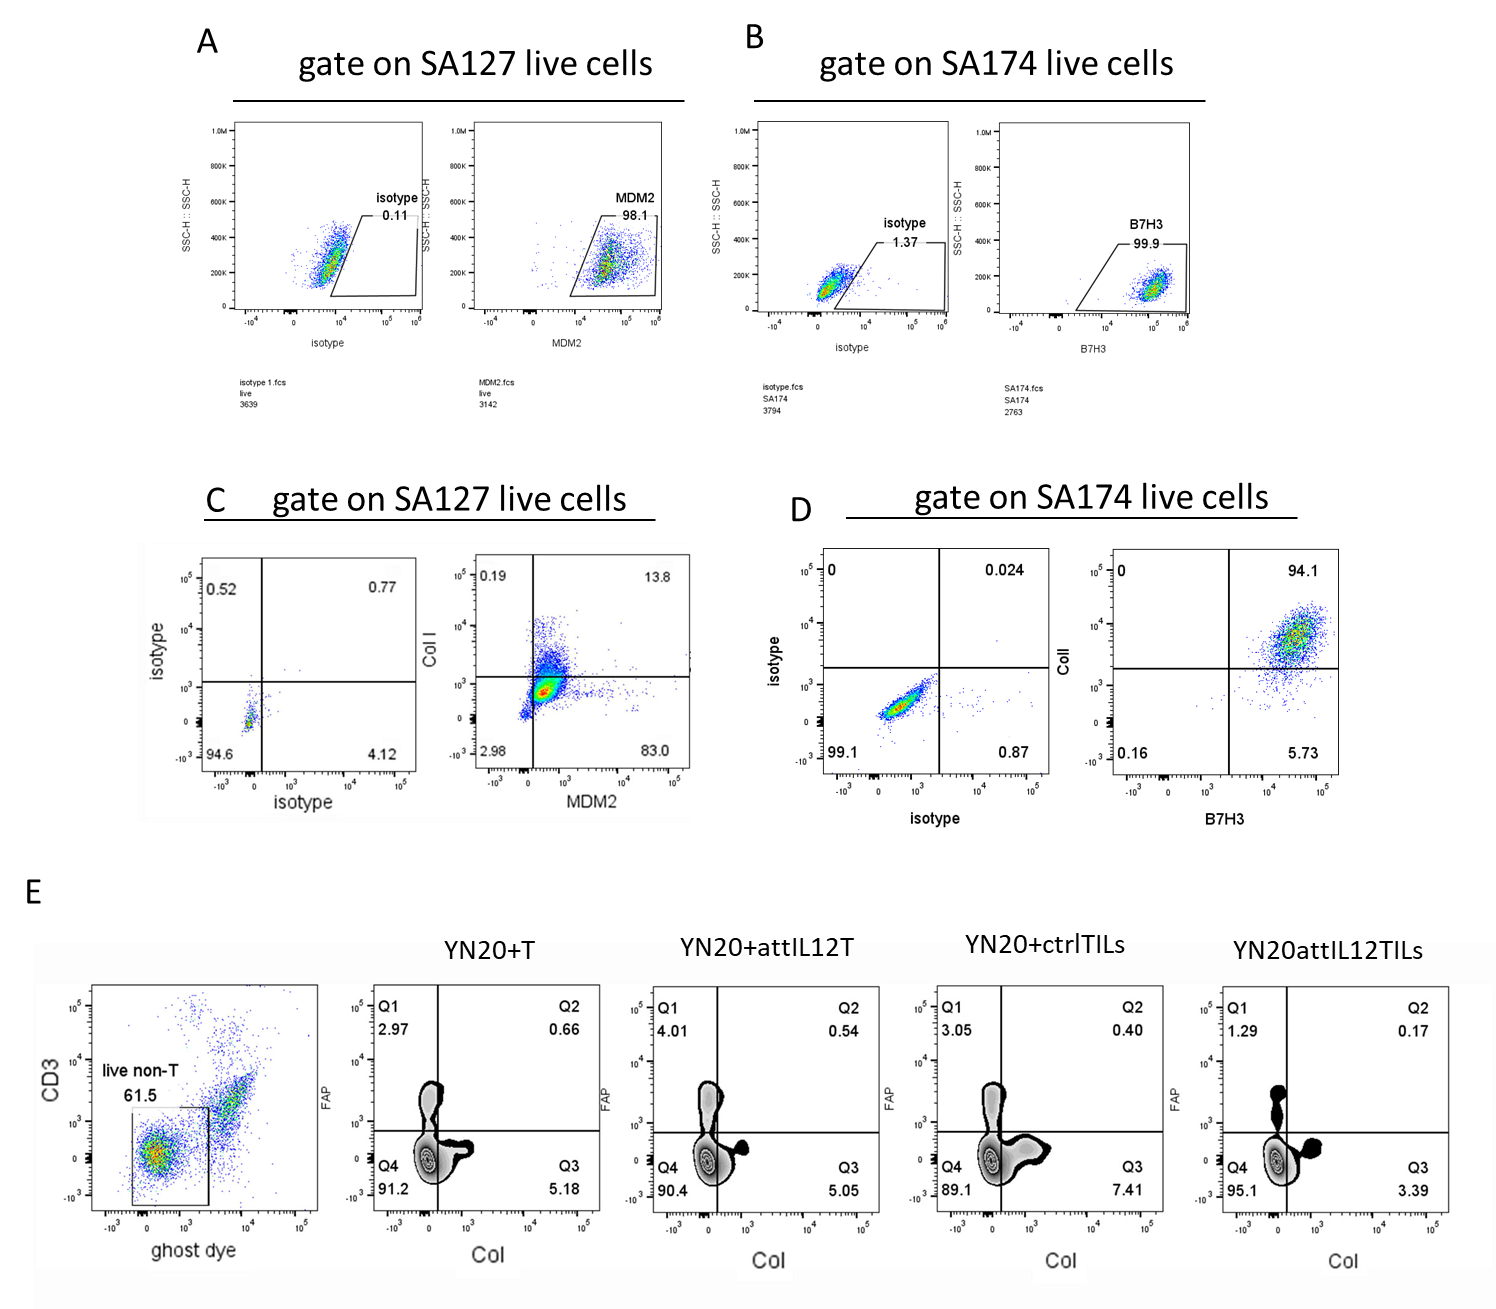


Fig. S5


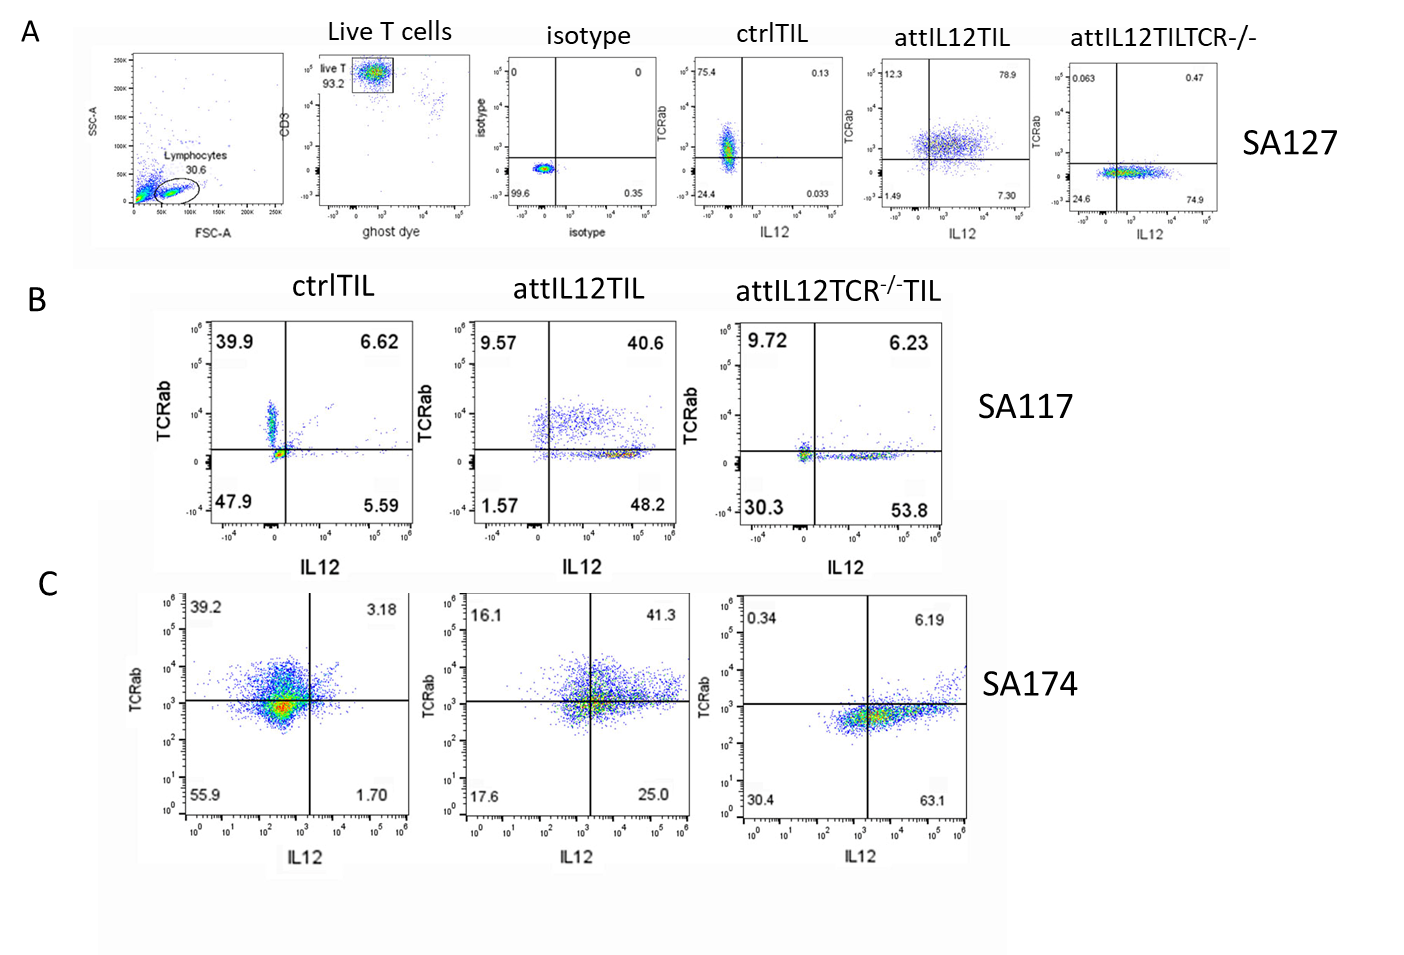


Fig. S6


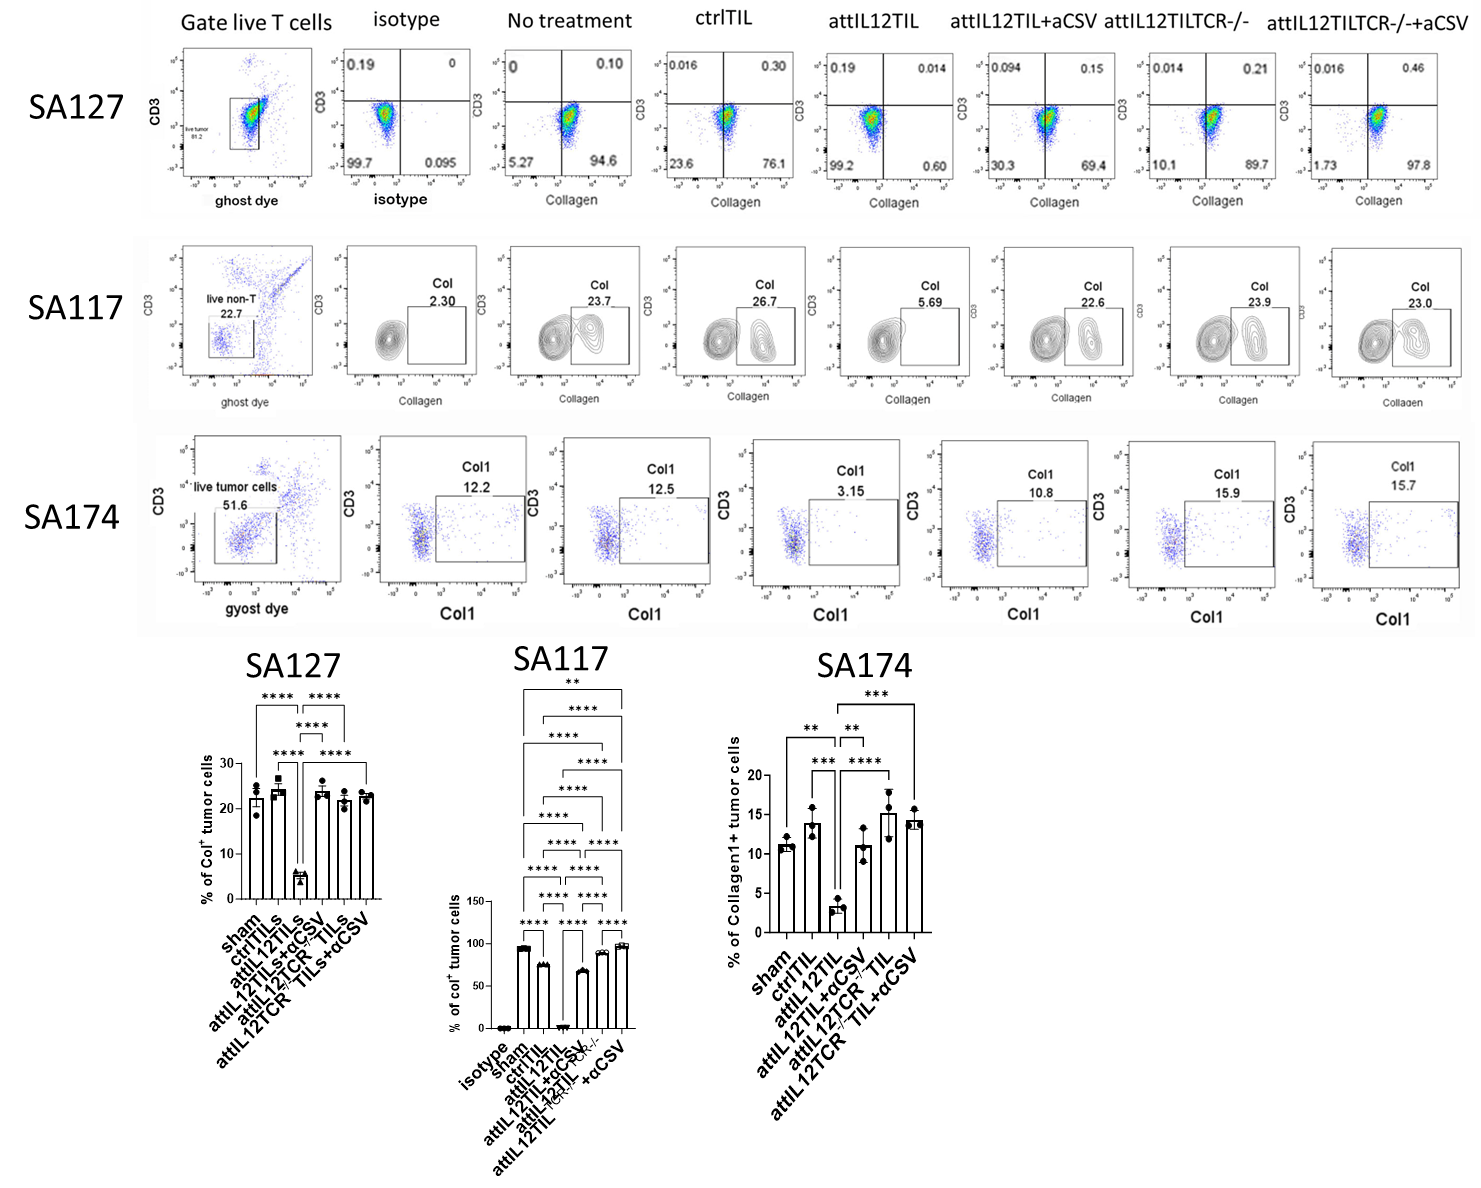


Fig. S7


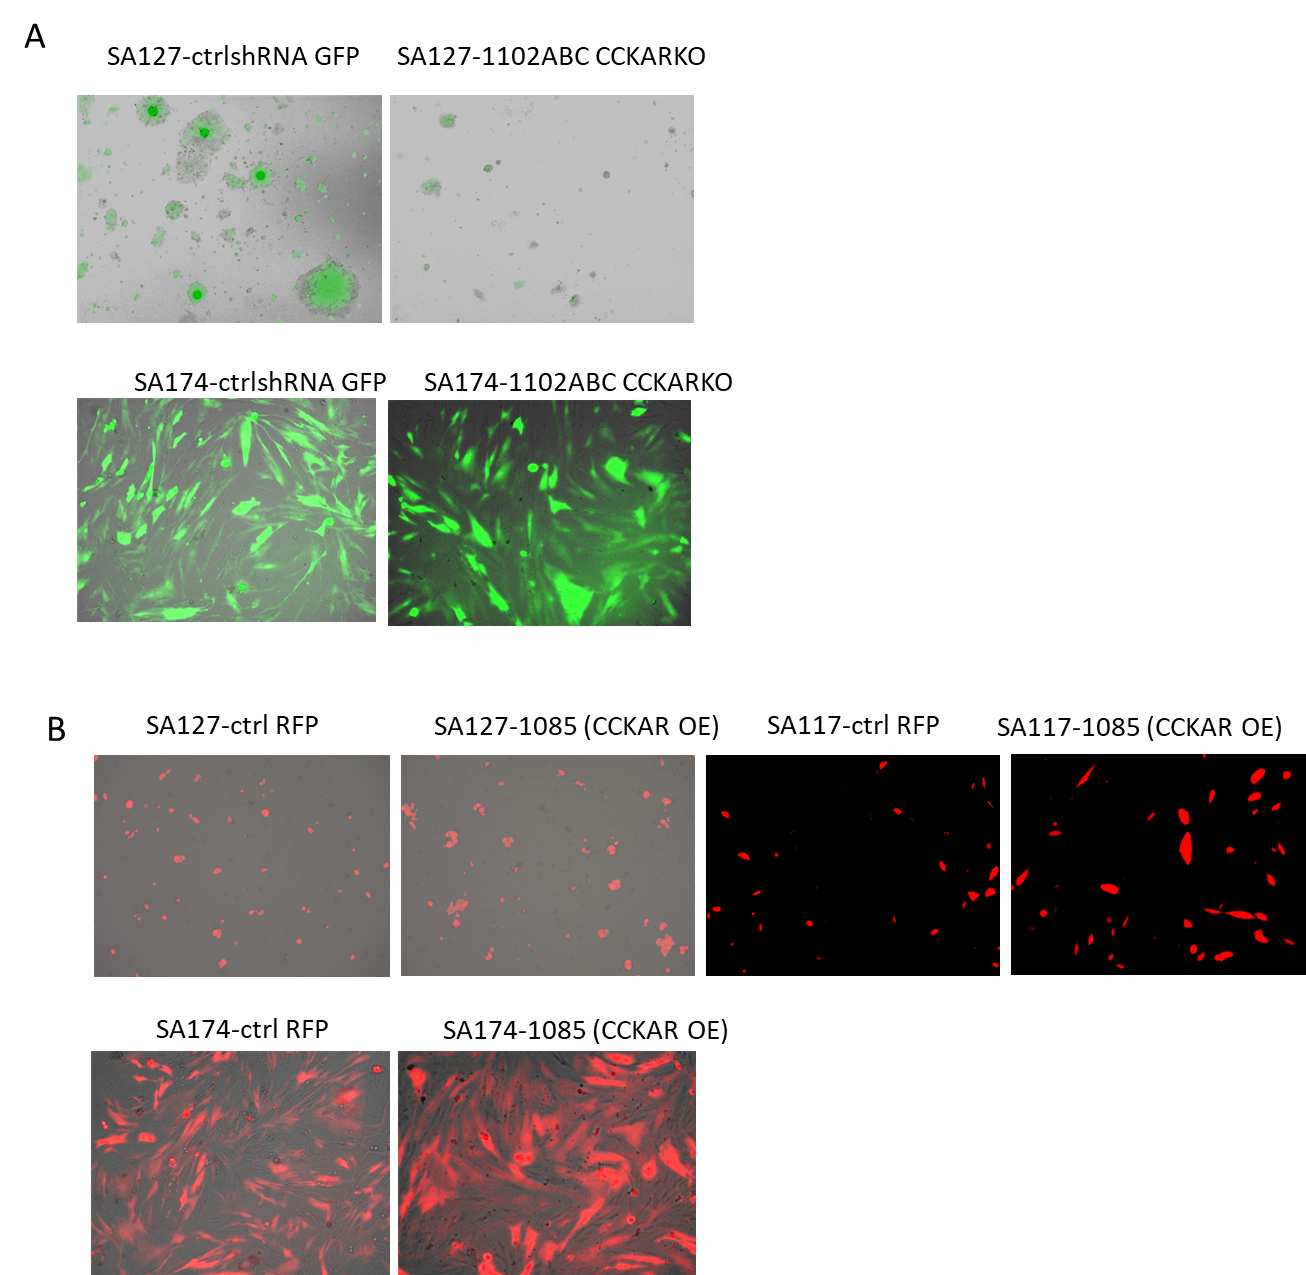


**Fig S1. SA174 and SA117 attIL12-TIL cell surface marker/effector molecule profiles.** **(A)** SA174 control TILs (ctrlTIL) and attIL12-TILs show similar cell surface markers. **(B)** Ctrl-TILs and attIL12-TILs from SA117 and SA174 models show similar effector molecule expression. **(C)** SA174 ctrlTILs and attIL12-TILs that infiltrated into tumors show similar cell surface marker profiles.

**Fig S2. SA127 TIL memory and effector molecule expression.** TILs isolated from SA127 tumors (Fig 2A) were stained with **(A)** memory feature markers, and **(B)** effector molecule markers.

**Fig S3. SA174 TIL cell surface markers and memory and effector molecule expression.** TILs isolated from SA174 tumors (Fig 2C) were stained with **(A)** cell surface markers, **(B, C)** memory feature markers, and **(D, E)** effector molecule markers. (A, C, E) Dimension reduction by UMAP, heatmaps, and graphs show the cluster for each treatment group.

**Fig S4. Collagen is mainly produced by sarcoma PDX tumor cells.** **(A, B)** SA127 (A) and SA174 (B) cells were stained with MDM2 (A) and B7H3 (B) antibodies, respectively, and detected via flow cytometry. **(C, D)** SA127 (C) and SA174 (D) tumors were dissociated and stained with collagen I and MDM2 (C) or B7H3 (D) antibodies, respectively, and detected via flow cytometry. **(E)** YN20 PDX tumors were dissociated and cocultured with T cells, attIL12-T cells, control TILs, or attIL12-TILs at a 1:1 ratio for 24 hours. Cell mixtures were stained with FAP and Col to determine immune cells’ impact on cancer-associated fibroblasts and collagen expression via flow cytometry.

**Fig S5. Effects of TCRα knockout (KO) in TILs.** **(A-C)** TILs from SA127 (A), SA117 (B), and SA174 (C) tumors were transduced with lentivirus containing a control vector, attIL12, or attIL12 plus TCRα KO, respectively. After 48 h, IL12 and TCRα/β expression were detected via flow cytometry.

**Fig S6. Collagen expression from tumor cells after coculture with control TILs, attIL12-TILs, or attIL12TCRα-/- TILs.** SA127, SA117, or SA174 tumor cells were cocultured with autologous control TILs, attIL12-TILs, or attIL12TCRα-/-TILs with or without a CSV-blocking antibody. Collagen was detected after coculture via flow cytometry.

**Fig S7. Immunofluorescence images of CCKAR knockout and CCKAR-overexpressing (OE) tumor cell lines.** **(A)** SA127 and SA174 tumor cells transduced with control (GFP) or CCKAR shRNA (GFP) virus. (B) SA127, SA117, and SA174 tumor cells transduced with control (cherry) or CCKAR (cherry) virus.
